# Supplementary material for: A new approach for cytokinin isolation from Arabidopsis tissues using miniaturized purification: pipette tip solid-phase extraction
Source: PubMed Central journal article supplement (PMC3492005; doi:10.1186/1746-4811-8-17), 2012-05-17

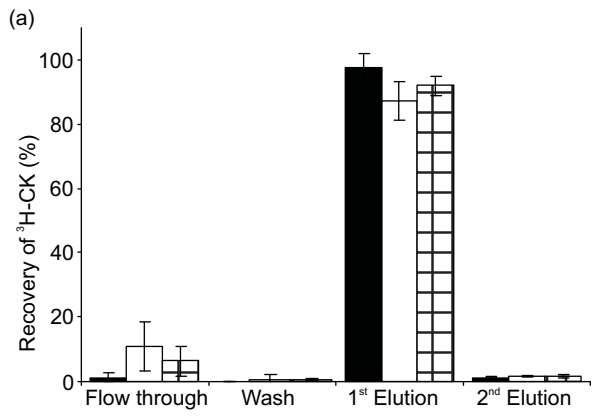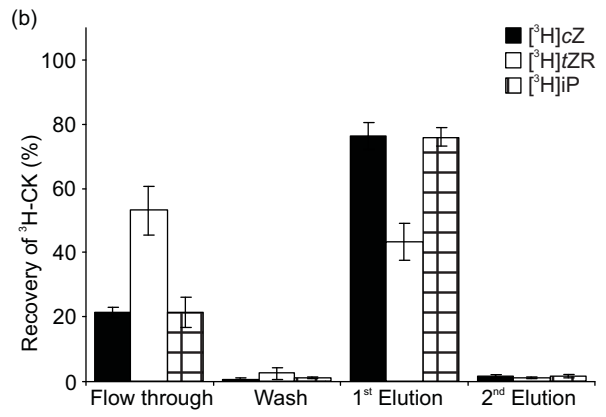

Supplement: 1746-4811-8-17-S2.pdf [file 1746-4811-8-17-S2.pdf]
