# Supplementary material for: A new approach for cytokinin isolation from Arabidopsis tissues using miniaturized purification: pipette tip solid-phase extraction
Source: PubMed Central journal article supplement (PMC3492005; doi:10.1186/1746-4811-8-17), 2012-05-17
Supplement: 1746-4811-8-17-S4.pdf [file 1746-4811-8-17-S4.pdf]

**Additional file 4 - Method validation.**

Intra- and interday precisions (%RSD) and recovery (%) is shown for three different concentrations (Low – 0.1 pmol/mg; Medium – 1pmol/mg; High – 10 pmol/mg). Plant tissues (1 mg FW of *A. thaliana* seedlings spiked with mixture of authentic CK standards) were extracted in Bielecki buffer, purified by multi-StageTip microcolumn chromatography and directly analysed by UPLC-ESI(+)-MS/MS.

| CKs          | Intraday precision <sup>a</sup> |                |                | Interday precision <sup>a</sup> |       |       | Recovery (%) <sup>b</sup> |         |         |
|--------------|---------------------------------|----------------|----------------|---------------------------------|-------|-------|---------------------------|---------|---------|
|              | L <sup>c</sup>                  | M <sup>c</sup> | H <sup>c</sup> | L                               | M     | H     | L                         | M       | H       |
| <i>tZ</i>    | 6.3%                            | 8.4%           | 3.7%           | 12.0%                           | 7.7%  | 10.4% | 89 ± 7                    | 80 ± 10 | 84 ± 5  |
| <i>tZR</i>   | 3.8%                            | 5.4%           | 2.6%           | 8.1%                            | 9.0%  | 6.6%  | 73 ± 1                    | 72 ± 12 | 82 ± 5  |
| <i>tZ7G</i>  | 3.4%                            | 2.2%           | 0.3%           | 5.1%                            | 1.3%  | 0.3%  | 93 ± 2                    | 88 ± 6  | 89 ± 7  |
| <i>tZ9G</i>  | 9.0%                            | 5.8%           | 3.4%           | 11.4%                           | 8.6%  | 2.6%  | 78 ± 3                    | 59 ± 7  | 84 ± 7  |
| <i>tZOG</i>  | 2.5%                            | 1.6%           | 1.9%           | 8.0%                            | 6.6%  | 6.5%  | 88 ± 10                   | 85 ± 5  | 91 ± 5  |
| <i>tZROG</i> | 7.4%                            | 8.2%           | 8.7%           | 5.7%                            | 8.2%  | 5.1%  | 58 ± 11                   | 55 ± 4  | 61 ± 2  |
| <i>tZMP</i>  | 10.2%                           | 2.0%           | 4.5%           | 11.9%                           | 3.1%  | 5.7%  | 40 ± 12                   | 35 ± 6  | 29 ± 4  |
| <i>cZ</i>    | 9.2%                            | 6.0%           | 2.9%           | 11.7%                           | 7.1%  | 10.3% | 86 ± 9                    | 75 ± 9  | 86 ± 11 |
| <i>cZR</i>   | 8.7%                            | 2.3%           | 2.1%           | 5.2%                            | 8.2%  | 6.3%  | 83 ± 4                    | 81 ± 13 | 94 ± 7  |
| <i>cZ9G</i>  | 9.2%                            | 2.0%           | 2.4%           | 6.1%                            | 6.6%  | 0.7%  | 78 ± 6                    | 74 ± 12 | 82 ± 7  |
| <i>cZOG</i>  | 8.2%                            | 7.4%           | 2.8%           | 9.1%                            | 5.3%  | 7.2%  | 92 ± 3                    | 89 ± 6  | 96 ± 2  |
| <i>cZROG</i> | 6.2%                            | 5.4%           | 4.1%           | 8.5%                            | 12.5% | 12.1% | 65 ± 4                    | 52 ± 6  | 58 ± 5  |
| <i>cZMP</i>  | 9.2%                            | 7.7%           | 6.7%           | 11.7%                           | 8.1%  | 9.3%  | 24 ± 5                    | 32 ± 3  | 30 ± 3  |
| DHZ          | 8.3%                            | 4.4%           | 0.7%           | 6.1%                            | 4.1%  | 5.1%  | 74 ± 6                    | 77 ± 13 | 81 ± 5  |
| DHZR         | 0.7%                            | 1.1%           | 2.8%           | 7.0%                            | 4.2%  | 2.0%  | 74 ± 6                    | 88 ± 13 | 92 ± 13 |
| DHZ7G        | 4.0%                            | 2.8%           | 1.1%           | 4.5%                            | 1.0%  | 1.4%  | 94 ± 2                    | 89 ± 3  | 86 ± 9  |
| DHZ9G        | 6.2%                            | 3.6%           | 2.3%           | 4.3%                            | 5.5%  | 5.3%  | 90 ± 9                    | 78 ± 10 | 67 ± 10 |
| DHZOG        | 5.9%                            | 2.4%           | 1.8%           | 5.8%                            | 6.5%  | 2.8%  | 91 ± 1                    | 77 ± 5  | 87 ± 2  |
| DHZROG       | 9.1%                            | 4.5%           | 2.0%           | 12.9%                           | 9.3%  | 5.0%  | 90 ± 2                    | 87 ± 8  | 95 ± 5  |
| DHZMP        | 10.1%                           | 8.9%           | 9.1%           | 12.9%                           | 10.7% | 7.7%  | 45 ± 8                    | 37 ± 1  | 40 ± 3  |
| iP           | 2.6%                            | 6.2%           | 2.4%           | 1.8%                            | 5.5%  | 5.0%  | 66 ± 3                    | 76 ± 9  | 86 ± 10 |
| iPR          | 4.6%                            | 2.6%           | 1.0%           | 3.5%                            | 1.9%  | 1.5%  | 88 ± 2                    | 84 ± 8  | 98 ± 8  |
| iP7G         | 5.1%                            | 3.1%           | 1.1%           | 3.4%                            | 1.7%  | 0.9%  | 94 ± 2                    | 83 ± 10 | 90 ± 8  |
| iP9G         | 3.3%                            | 2.7%           | 1.6%           | 11.9%                           | 8.4%  | 5.0%  | 67 ± 11                   | 74 ± 8  | 92 ± 8  |
| iPMP         | 7.5%                            | 4.1%           | 4.5%           | 9.8%                            | 11.0% | 7.6%  | 76 ± 17                   | 78 ± 9  | 69 ± 9  |

<sup>a</sup> %RSD (n=3); <sup>b</sup> Values are means ± SD (n = 4); <sup>c</sup> L=0.1 pmol/mg, M=1pmol/mg; H=10 pmol/mg.
