# Supplementary material for: A new approach for cytokinin isolation from Arabidopsis tissues using miniaturized purification: pipette tip solid-phase extraction
Source: PubMed Central journal article supplement (PMC3492005; doi:10.1186/1746-4811-8-17), 2012-05-17
Supplement: 1746-4811-8-17-S5.pdf [file 1746-4811-8-17-S5.pdf]

**Additional file 5 - Levels of CK metabolites in varied amounts of *Arabidopsis thaliana* seedlings, roots and shoots.**

10-day-old seedlings, roots and shoots were extracted in Bielecki buffer, purified by StageTip microcolumns and measured by UPLC-ESI(+)-MS/MS method. *t/cZ*, *t/cZROG*, *t/cZMP*, *DHZ*, *DHZROG*, *DHZMP*, *iP9G*, and *iPMP* were not detected in *Arabidopsis* extracts.

| Weight<br>(mg FW) | Cytokinin content (fmol in sample) |            |             |             |             |            |             |             |             |              |              |              |           |            |             |
|-------------------|------------------------------------|------------|-------------|-------------|-------------|------------|-------------|-------------|-------------|--------------|--------------|--------------|-----------|------------|-------------|
|                   | <i>tZ</i>                          | <i>tZR</i> | <i>tZ7G</i> | <i>tZ9G</i> | <i>tZOG</i> | <i>cZR</i> | <i>cZ9G</i> | <i>cZOG</i> | <i>DHZR</i> | <i>DHZ7G</i> | <i>DHZ9G</i> | <i>DHZOG</i> | <i>iP</i> | <i>iPR</i> | <i>iP7G</i> |
| <b>Seedlings</b>  |                                    |            |             |             |             |            |             |             |             |              |              |              |           |            |             |
| 1                 | n.d.                               | n.d.       | 41.9±1.9    | 3.7±1.1     | 8.3±2.5     | 0.6±0.1    | n.d.        | 1.0±0.3     | n.d.        | 5.6±1.1      | n.d.         | 0.5±0.1      | n.d.      | 1.7±0.2    | 51.1±2.0    |
| 2                 | n.d.                               | 3.4±0.4    | 70.2±9.0    | 8.2±2.6     | 18.7±5.0    | 1.5±0.9    | n.d.        | 1.5±0.3     | 0.9±0.5     | 10.4±3.4     | n.d.         | 0.8±0.2      | n.d.      | 3.7±0.6    | 105.0±4.2   |
| 5                 | n.d.                               | 13.9±2.9   | 184.8±10.0  | n.d.        | 50.9±6.6    | 3.2±0.3    | n.d.        | 5.1±2.0     | 3.5±1.2     | 28.3±5.4     | n.d.         | 2.7±0.9      | 1.2±0.6   | 11.6±2.0   | 270.1±22.7  |
| <b>Shoots</b>     |                                    |            |             |             |             |            |             |             |             |              |              |              |           |            |             |
| 1                 | n.d.                               | 0.8±0.3    | 26.8±2.8    | 4.5±1.5     | 8.1±2.1     | 1.1±0.4    | n.d.        | 1.1±0.4     | 0.8±0.2     | 6.2±2.0      | 0.7±0.3      | 0.3±0.1      | n.d.      | 1.1±0.2    | 58.0±11.5   |
| 2                 | n.d.                               | 1.6±0.6    | 44.2±3.8    | 10.7±3.7    | 17.9±2.4    | 2.0±0.8    | n.d.        | 1.7±0.5     | 1.9±0.7     | 10.4±1.9     | 1.7±0.6      | 0.6±0.2      | n.d.      | 2.3±0.4    | 127.6±21.9  |
| 5                 | n.d.                               | 5.5±1.7    | 107.9±22.8  | 15.5±2.8    | 55.9±9.9    | 4.5±1.5    | n.d.        | 5.8±1.9     | 5.5±1.6     | 29.6±7.7     | 2.9±0.6      | 1.2±0.3      | 0.7±0.1   | 7.2±2.0    | 312.4±74.7  |
| <b>Roots</b>      |                                    |            |             |             |             |            |             |             |             |              |              |              |           |            |             |
| 1                 | n.d.                               | 3.7±0.6    | 7.3±0.6     | 1.9±0.6     | 6.3±0.5     | 3.1±0.8    | 1.3±0.2     | 3.1±0.9     | 0.6±0.2     | 2.2±0.3      | 0.3±0.1      | n.d.         | 0.4±0.2   | 2.0±0.3    | 26.2±4.8    |
| 2                 | 2.1±0.7                            | 6.1±1.3    | 11.4±0.7    | 4.1±1.4     | 13.6±2.0    | 6.8±1.3    | 4.9±0.7     | 5.9±1.1     | 2.0±0.7     | 3.7±0.6      | 0.6±0.1      | 0.4±0.1      | 0.7±0.1   | 4.3±0.9    | 61.9±7.5    |
| 5                 | 4.2±1.1                            | 15.4±1.8   | 32.9±6.8    | 11.5±1.4    | 37.8±8.2    | 23.4±4.9   | 14.3±4.3    | 13.2±2.4    | 6.3±2.1     | 10.9±3.2     | 1.3±0.2      | n.d.         | 2.0±0.7   | 12.1±3.1   | 166.9±26.1  |

Values are means ± SD (n = 4); n.d. – not detected.
